# Supplementary material for: The Knockout for G Protein-Coupled Receptor-Like PfSR25 Increases the Susceptibility of Malaria Parasites to the Antimalarials Lumefantrine and Piperaquine but Not to Medicine for Malaria Venture Compounds
Source: PubMed Central journal article supplement (PMC8006397; doi:10.3389/fmicb.2021.638869), 2021-03-15
Supplement: Data_Sheet_1.pdf [file Data_Sheet_1.pdf]

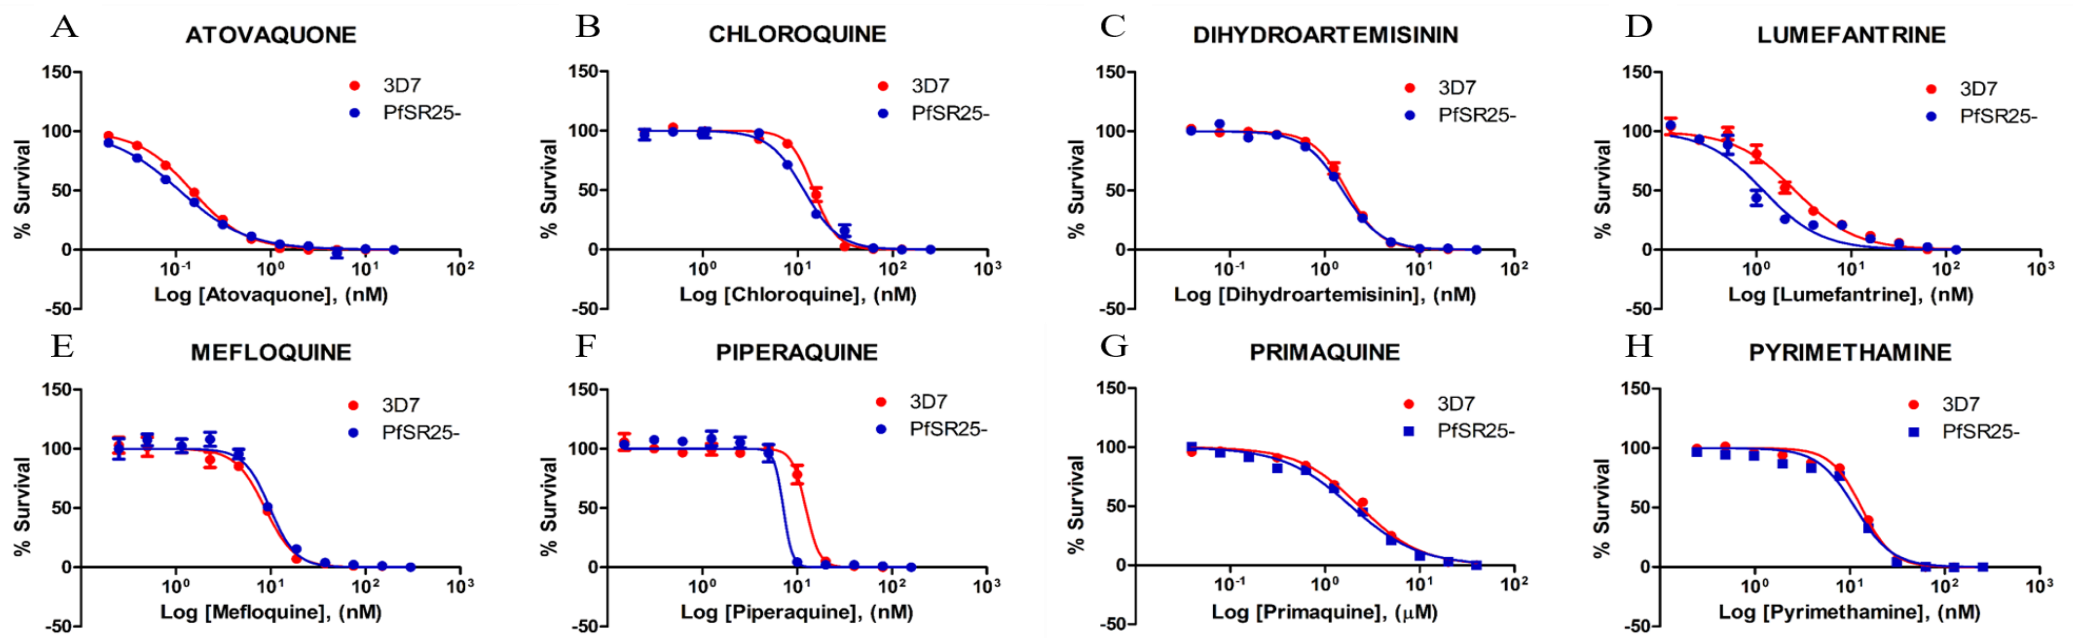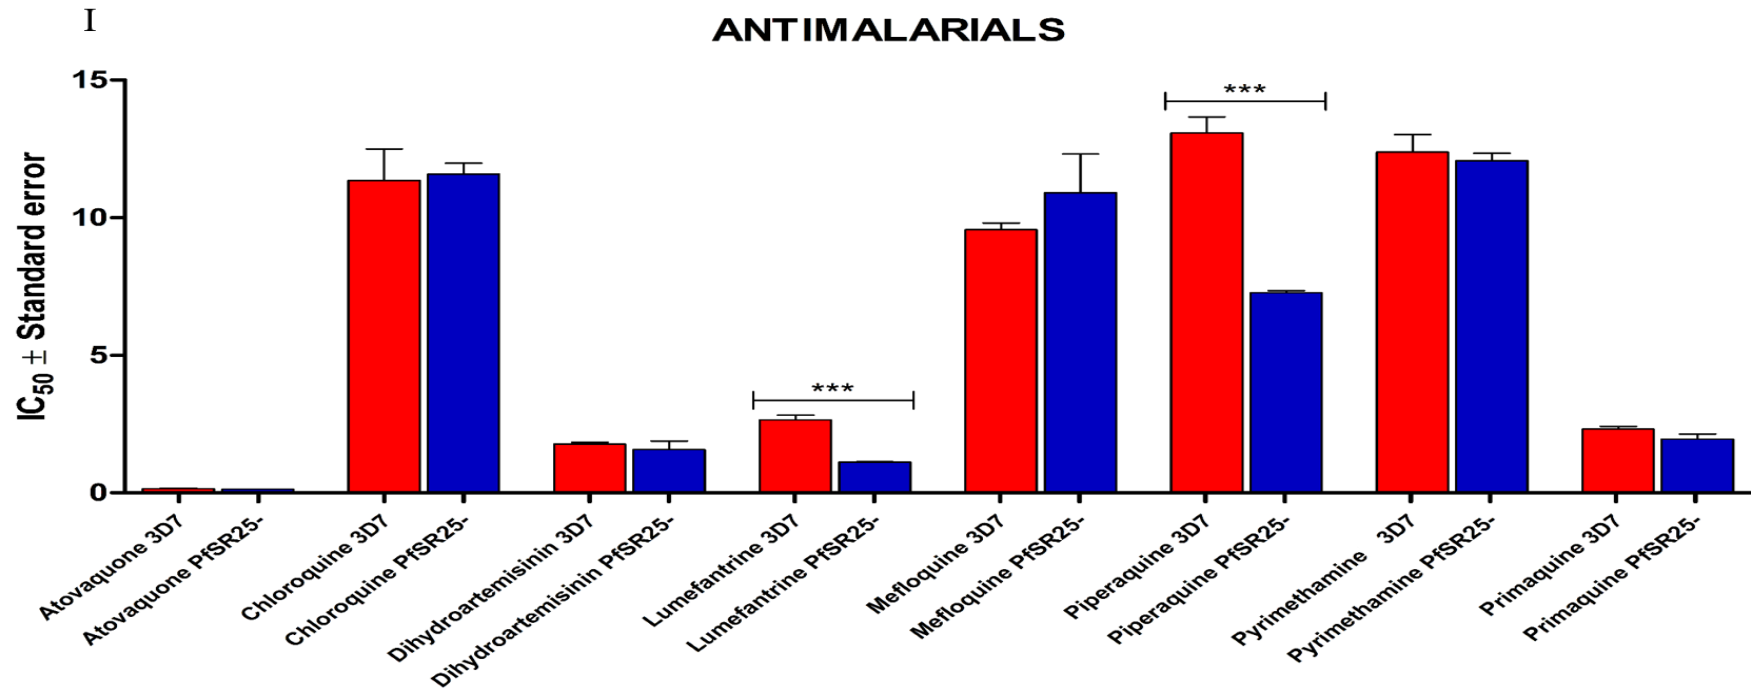

**Supplementary Figure 1:** Dose-response curves, Erythrocytes infected with *P. falciparum* 3D7 (Red) or PfSR25- (Blue) were incubated for 72 h with antimalarial compounds (A) Atovaquone, (B) Chloroquine, (C) Dihydroartemisinin, (D) Lumefantrine, (E) Mefloquine, (F) Piperaquine, (G) Primaquine and (H) Pyrimethamine. (I) Statistical calculation of the difference between 3D7 and PfSR25- strains on the IC<sub>50</sub> values taking into account the mean error ( $\pm$ ) calculated by Student's t-test.
