# Supplementary material for: The Knockout for G Protein-Coupled Receptor-Like PfSR25 Increases the Susceptibility of Malaria Parasites to the Antimalarials Lumefantrine and Piperaquine but Not to Medicine for Malaria Venture Compounds
Source: PubMed Central journal article supplement (PMC8006397; doi:10.3389/fmicb.2021.638869), 2021-03-15
Supplement: Data_Sheet_2.pdf [file Data_Sheet_2.pdf]

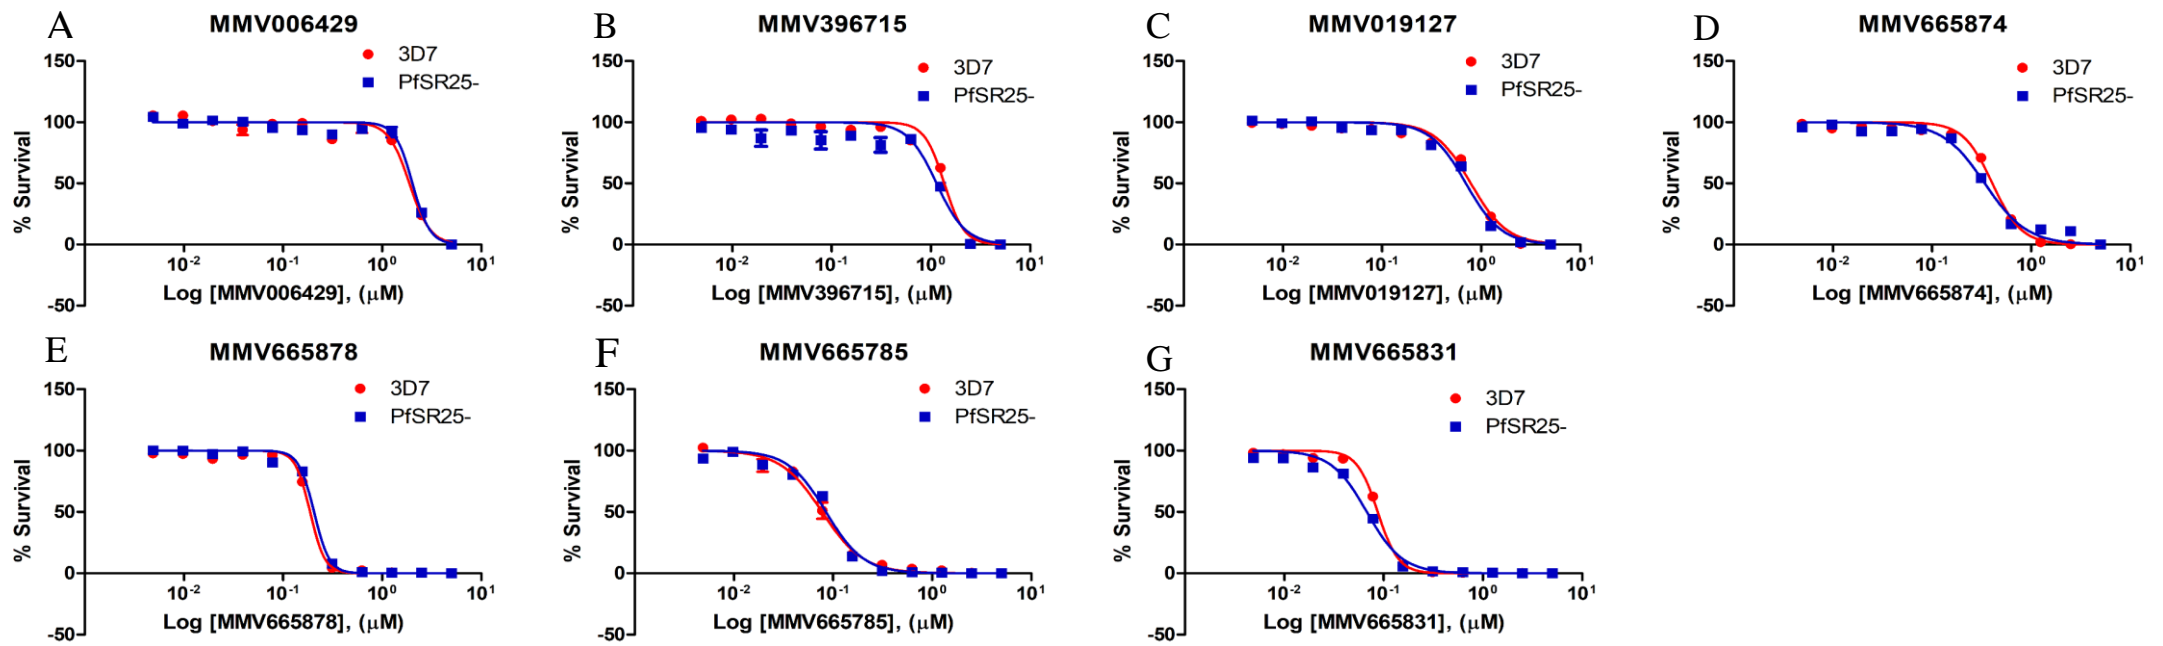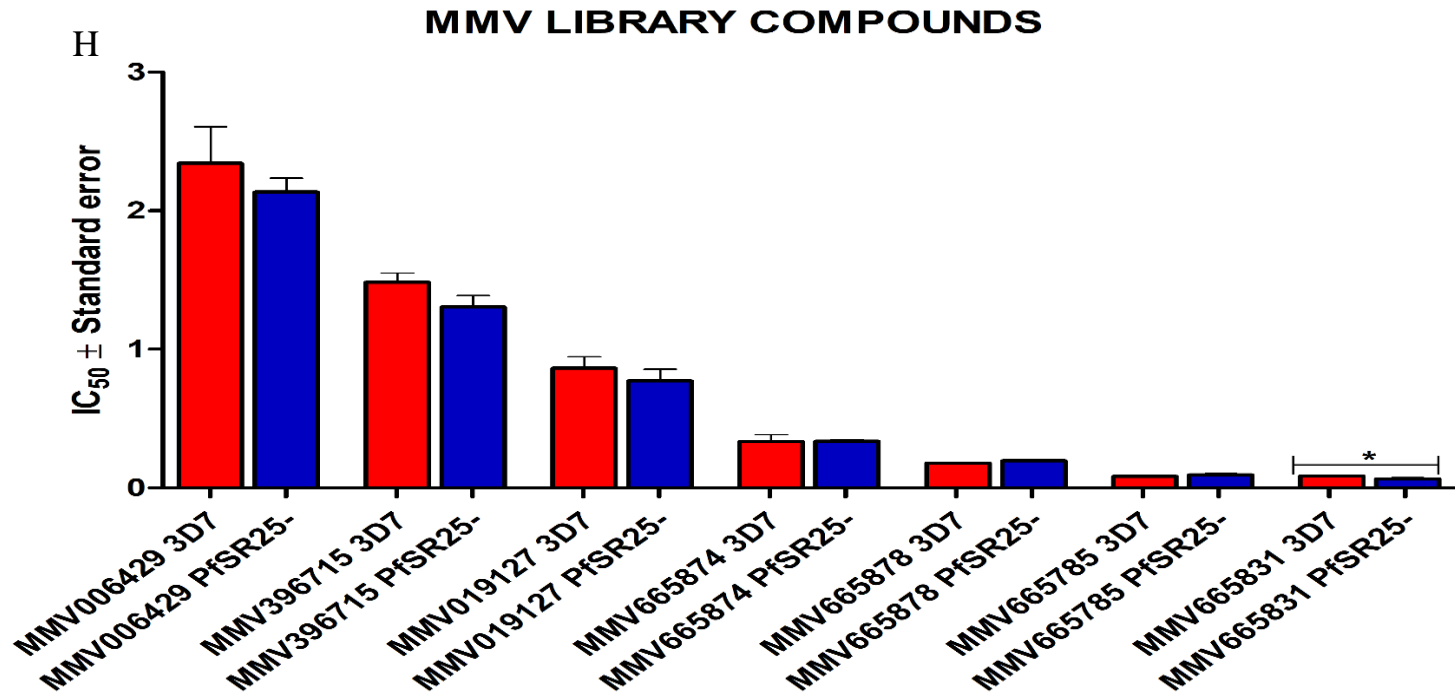

**Supplementary Figure 2:** Dose-response curves, Erythrocytes infected with *P. falciparum* 3D7 (Red) or PfSR25- (Blue) were incubated for 72 h with MMV compounds (A) MMV006429, (B) MMV396715, (C) MMV019127, (D) MMV665874, (E) MMV665878, (F) MMV665785 and (G) MMV665831. (H) Statistical calculation of the difference between 3D7 and PfSR25- strains on the IC<sub>50</sub> values taking into account the mean error (±) calculated by Student's t-test.
